# Supplementary material for: Adaptive yielding scheme for link scheduling in OFDM-based synchronous device-to-device (D2D) communication system
Source: Springer Nature journal article supplement (doi:10.1186/1687-1499-2014-157), 2014-09-27

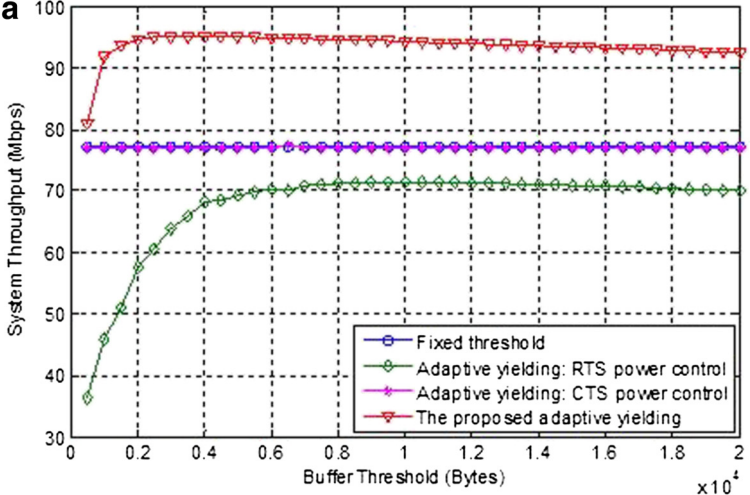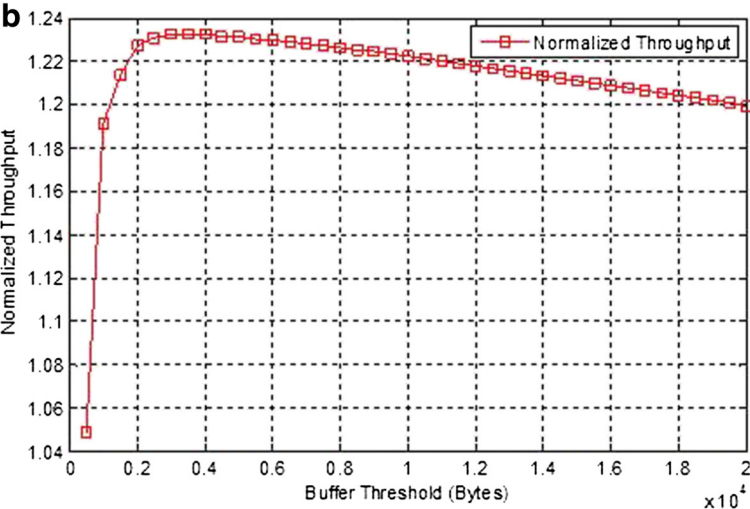

Supplement: 13638_2014_976_MOESM15_ESM.pdf [file 13638_2014_976_MOESM15_ESM.pdf]
